# Supplementary material for: Polyoxometalate-based metal–organic framework NENU-5 hybrid materials for photoluminescence tuning by introducing lanthanide ions and their functionalized soft ionogel/thin film
Source: Royal Society of Chemistry journal article supplement (doi:10.1039/c8ce01979g), 2019-01-01
Supplement: c8ce01979g1.pdf [file c8ce01979g1.pdf]

## Supporting information

Polyoxometalate-based metal–organic frameworks NENU-5 hybrid materials for photoluminescence tuning by introducing lanthanide ions and their functionalized soft ionogels / thin film

Bing-Hui Wang,<sup>a</sup> and Bing Yan<sup>\*a,b</sup>

<sup>a</sup> *School of Chemical Science and Engineering, Tongji University, Shanghai 200092, China*

<sup>b</sup> *School of Materials Science and Engineering, Liaocheng University, Liaocheng 252059, China*

\* Corresponding author: Email address: [byan@tongji.edu.cn](mailto:byan@tongji.edu.cn) (Bing Yan)

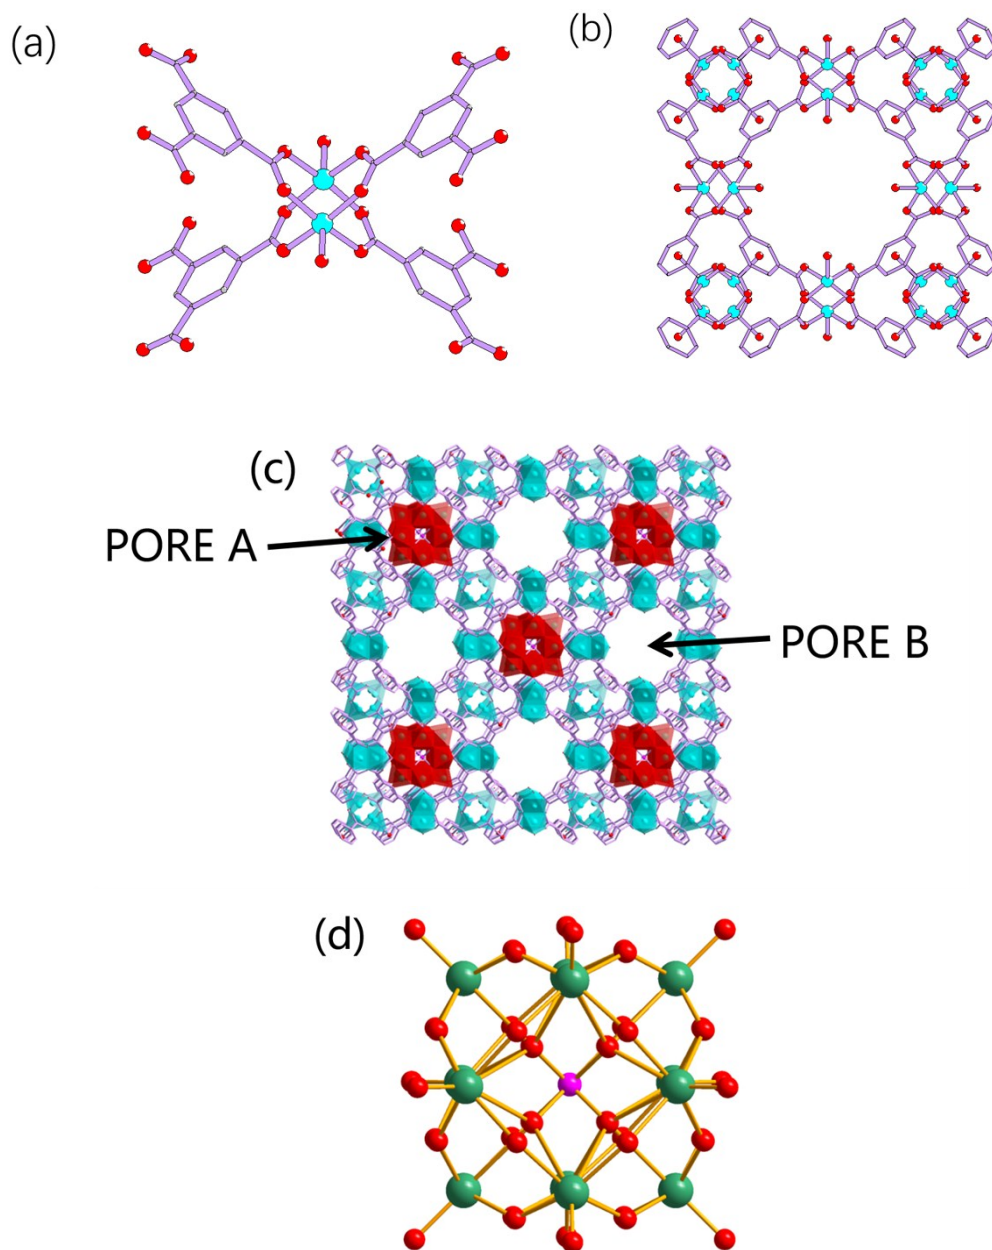

Fig. S1 (a) the paddle-wheel  $\text{Cu}_2$  unit; (b) the (3, 4)-connected framework of NENU-5. (c) Components of the crystal structures of NENU-5; (d) the structure of POM  $[\text{PMo}_{12}\text{O}_{40}]^{3-}$  in NENU-5. Blue, red, green, purple spheres represent Cu, O, Mo, P atoms, respectively.

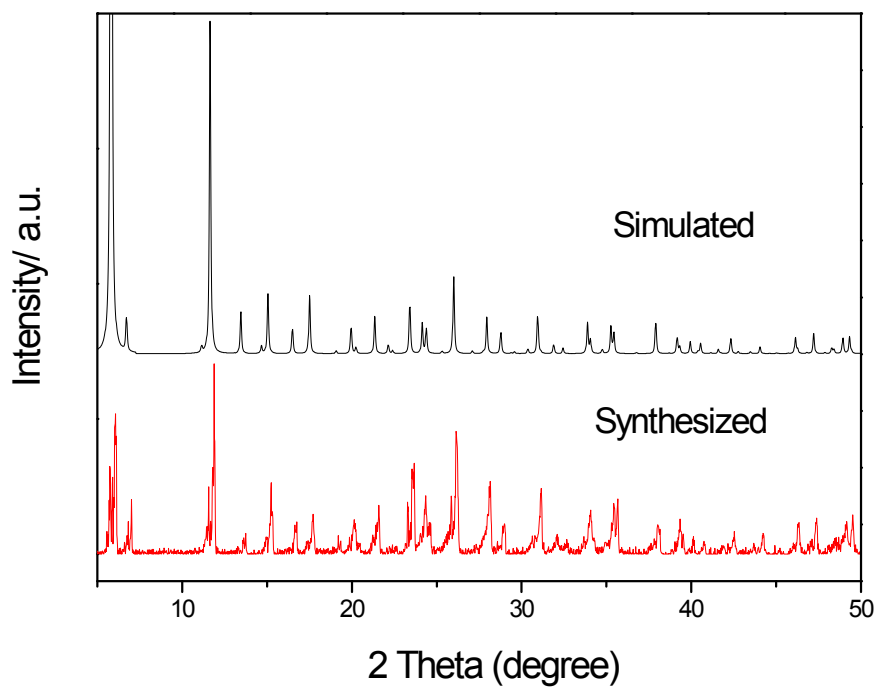

Fig. S2 Powder X-ray diffraction (PXRD) pattern of the synthesized NENU-5 and the simulated.

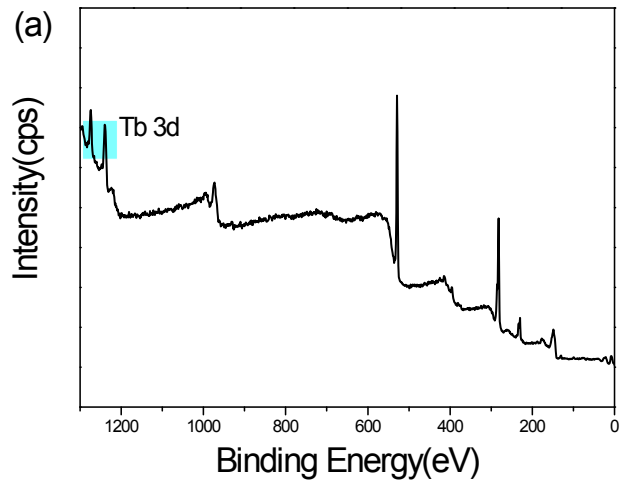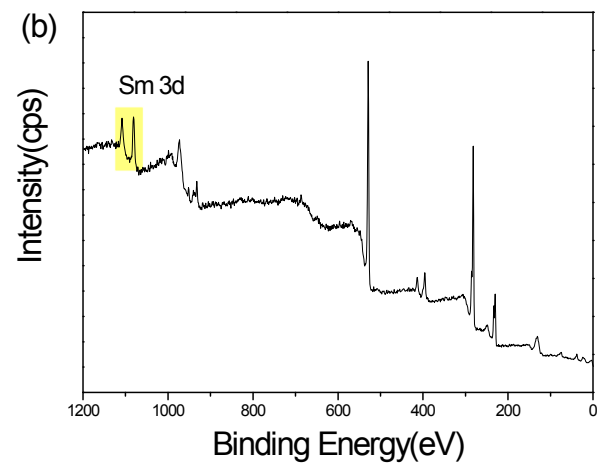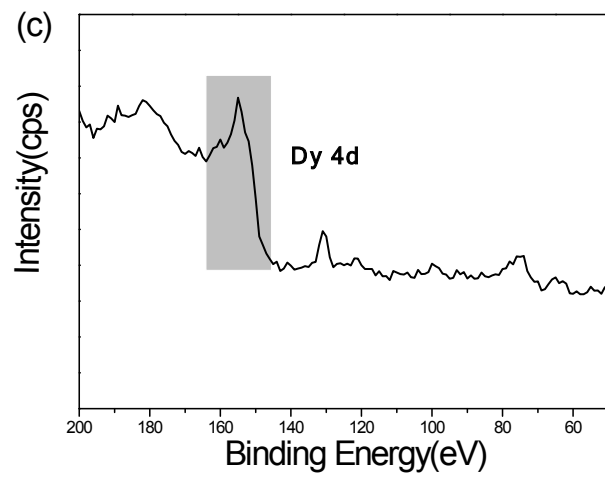

Fig. S3 XPS pattern of  $Tb^{3+}$ @NENU-5,  $Sm^{3+}$ @NENU-5 and  $Dy^{3+}$ @NENU-5

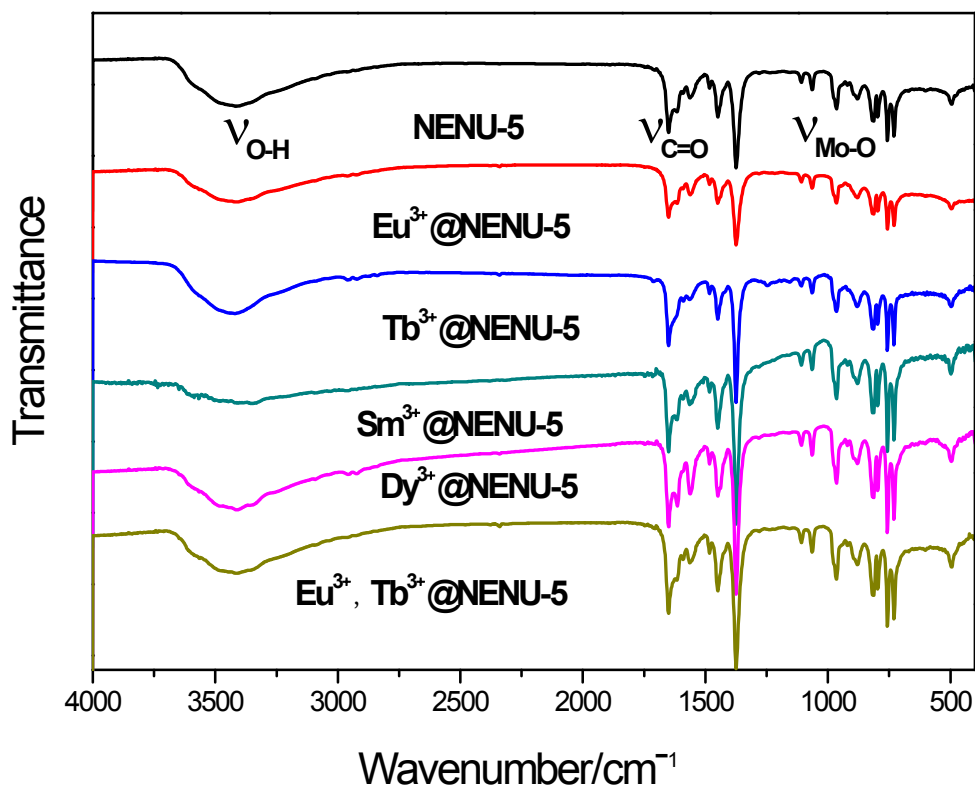

Figure S4 FTIR spectra analysis of NENU-5 and  $\text{Ln}^{3+}@NENU-5$  ( $\text{Ln} = \text{Eu}, \text{Tb}, \text{Sm}, \text{Dy}, \text{Eu/Tb}$ )

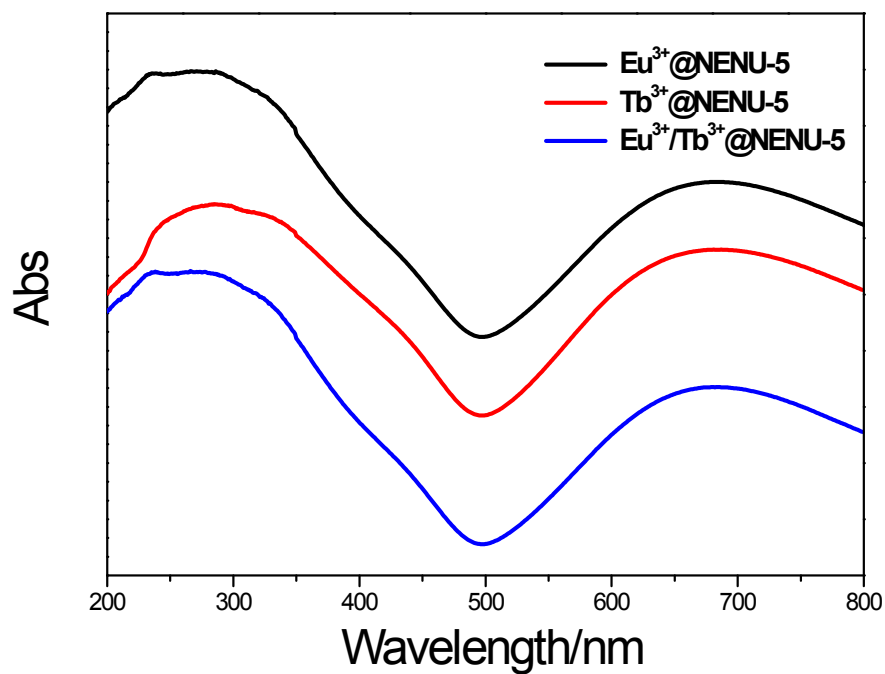

Fig. S5 UV-vis diffuse reflectance spectrum of  $\text{Eu}^{3+}@NENU-5$ ,  $\text{Tb}^{3+}@NENU-5$ ,  $\text{Eu}^{3+}/\text{Tb}^{3+}@NENU-5$ .

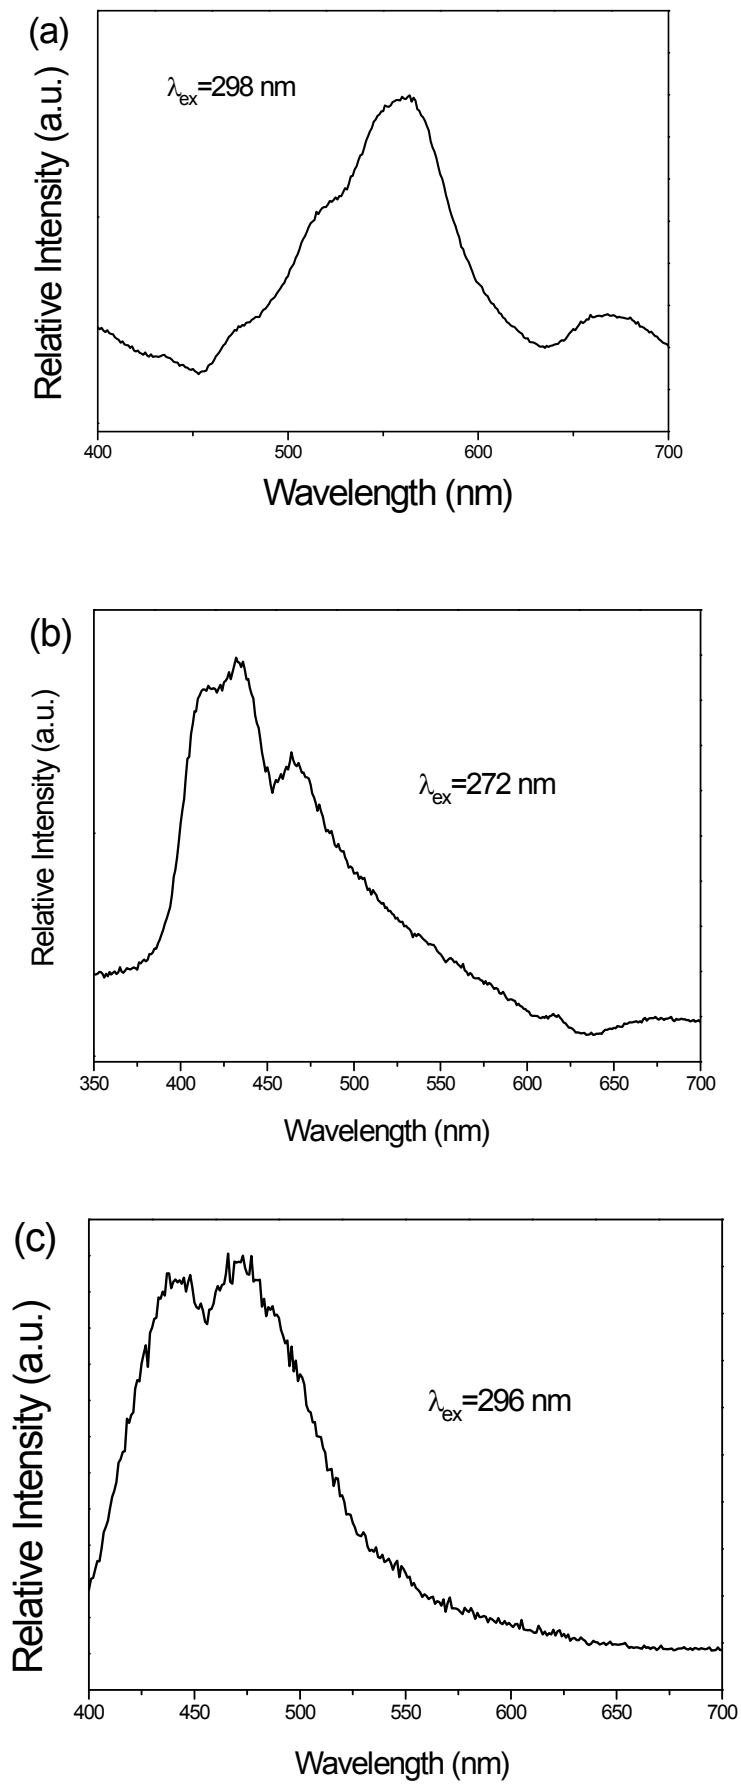

Fig. S6 Emission spectra of H<sub>3</sub>BTC (a) , H<sub>3</sub>PMo<sub>12</sub>O<sub>40</sub>(b) and NENU-5(c)

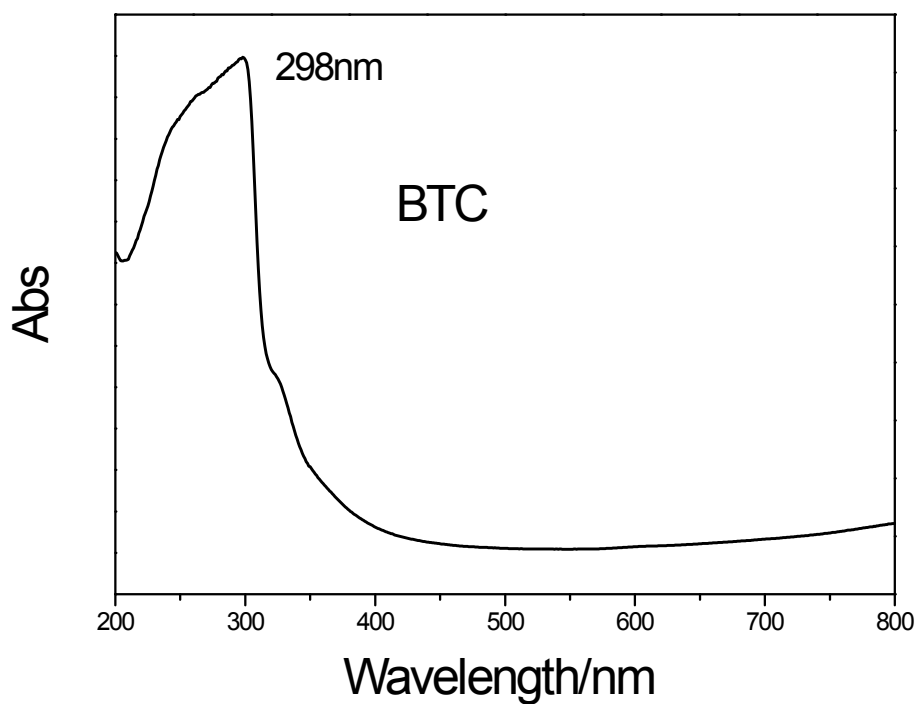

Fig. S7 UV-vis diffuse reflectance spectrum of BTC

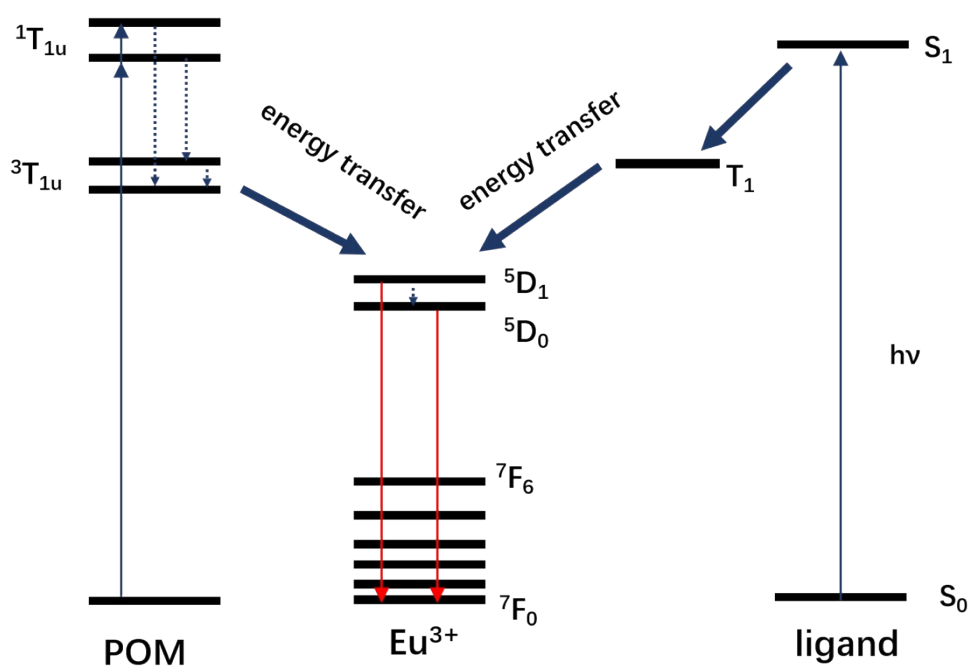

Fig. S8 Simple energy schematic diagram  $\text{Eu}^{3+}$  emission sensitized by both POM and ligand.

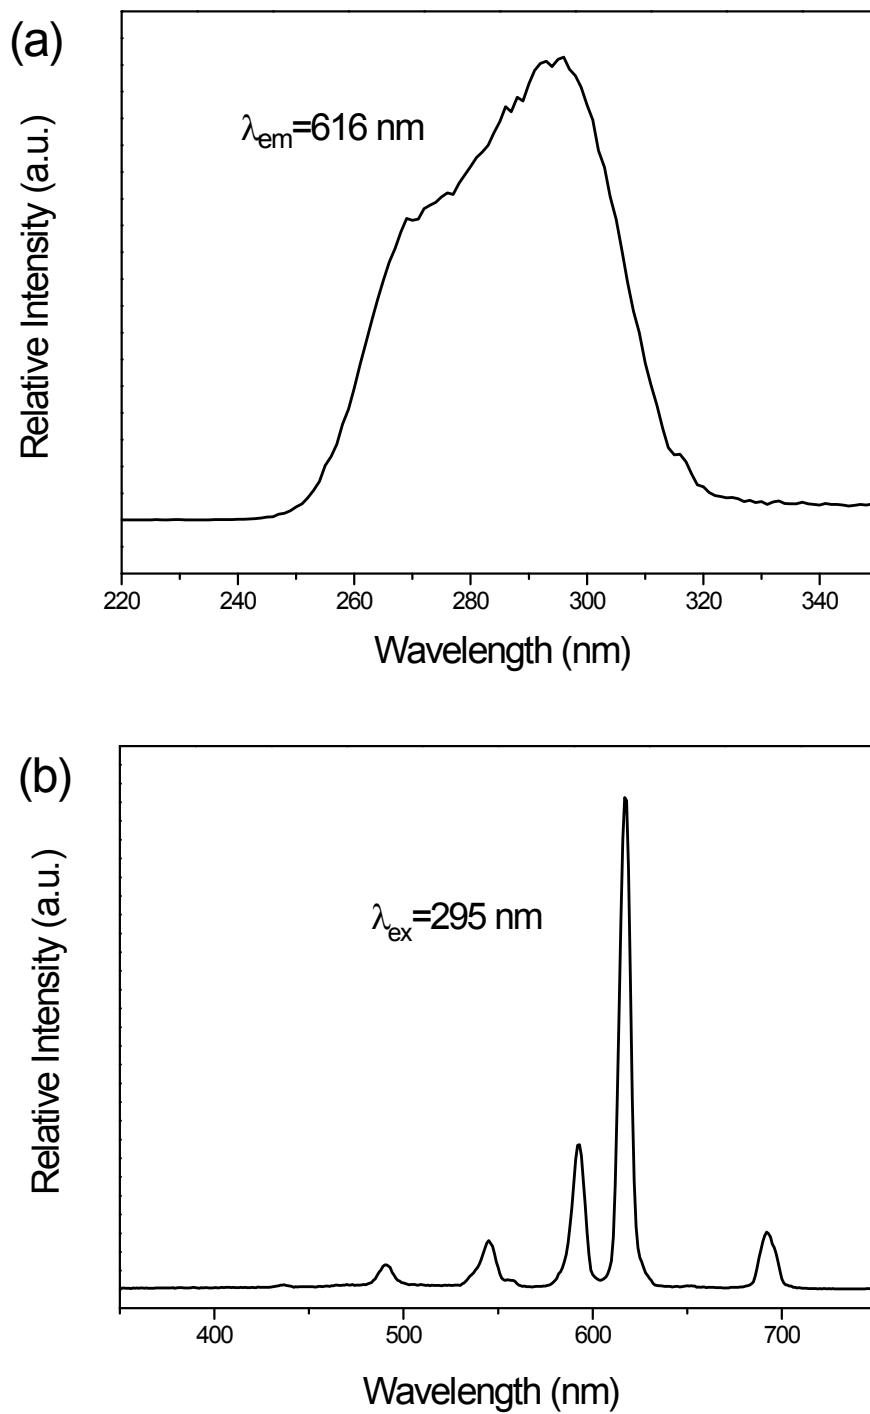

Figure S9 Excitation spectrum(a) and emission spectrum(b) of  $\text{Eu}^{3+} / \text{Tb}^{3+}@ \text{NENU-5}$



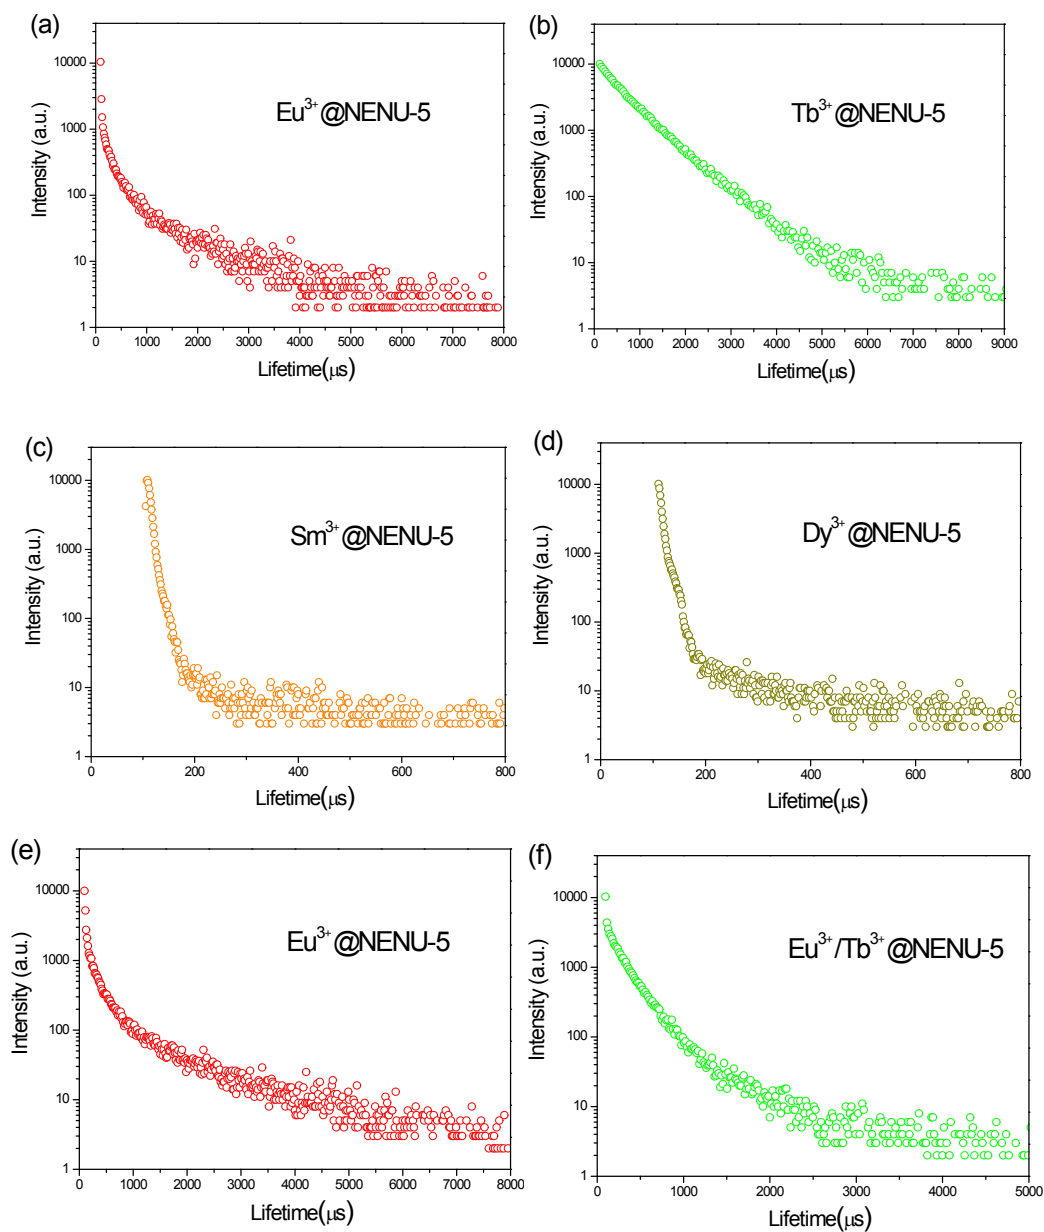

Fig. S10 Decay curves of  $\text{Eu}^{3+}$ @NENU-5(a) ( $\lambda_{\text{em}}=615\text{nm}$ ),  $\text{Tb}^{3+}$ @NENU-5(b) ( $\lambda_{\text{em}}=543\text{nm}$ ),  $\text{Sm}^{3+}$ @NENU-5(c) ( $\lambda_{\text{em}}=598\text{nm}$ ),  $\text{Dy}^{3+}$ @NENU-5(d) ( $\lambda_{\text{em}}=574\text{nm}$ ),  $\text{Eu}^{3+}/\text{Tb}^{3+}$ @NENU-5( $\lambda_{\text{em}}=615\text{nm}$ )(e),  $\text{Eu}^{3+}/\text{Tb}^{3+}$ @NENU-5( $\lambda_{\text{em}}=543\text{nm}$ )(f).

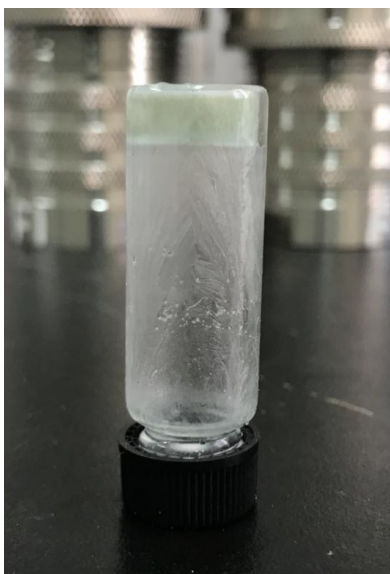

Fig. S11  $\text{Eu}^{3+} / \text{Tb}^{3+}$ @NENU-5 ionic liquid in room temperature

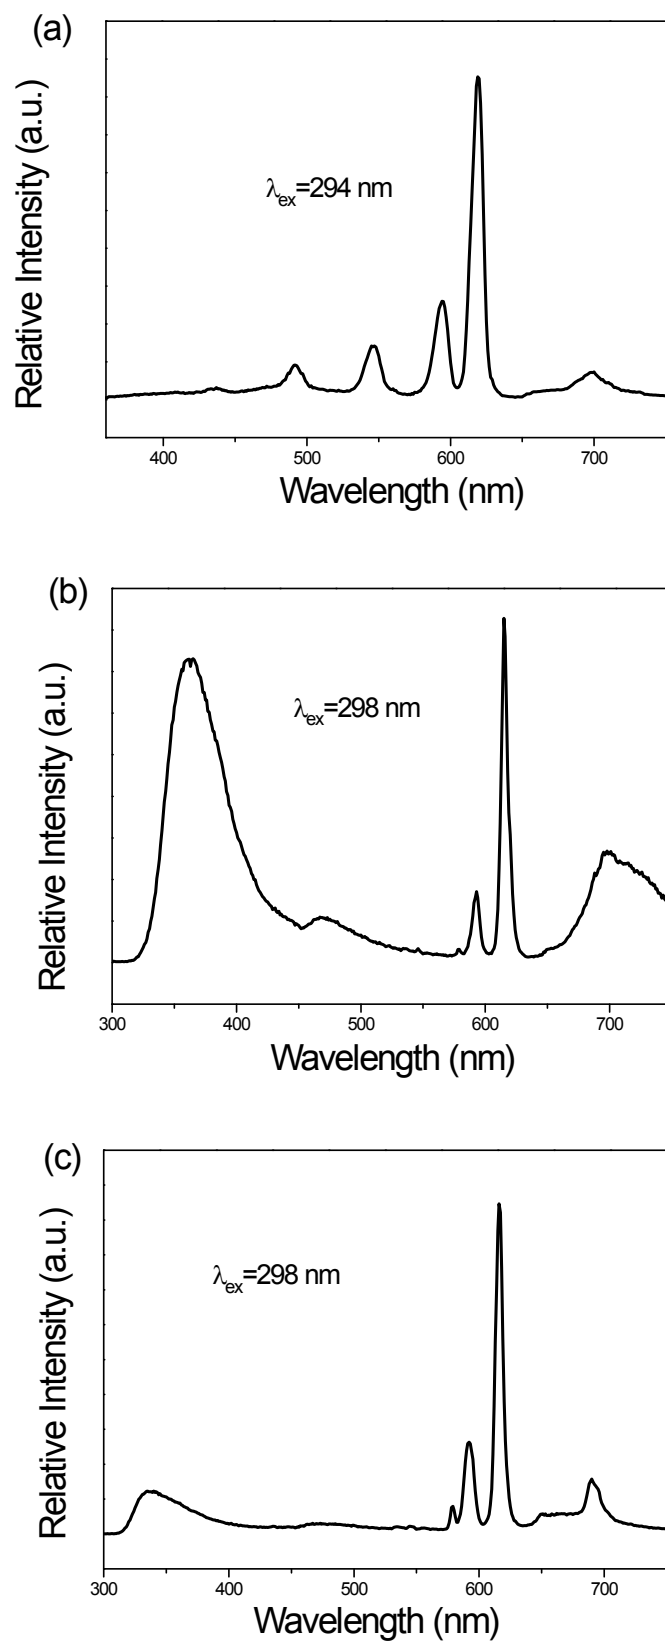

Fig. S12 Emission spectra of the soft ionogel loaded 1g  $\text{Eu}^{3+}$  /  $\text{Tb}^{3+}$ @NENU-5(a), the thin film loaded 2.5mg(b) and 7.5mg  $\text{Eu}^{3+}$ @NENU-5 sample.

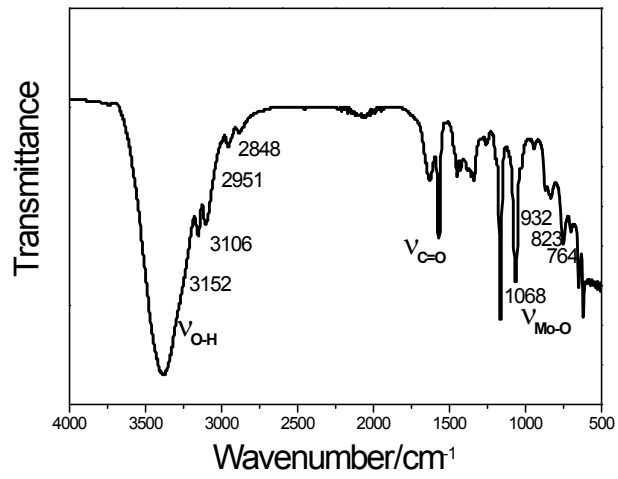

Fig. S13 IR spectrum of Eu<sup>3+</sup>/Tb<sup>3+</sup>@1 soft ionogel

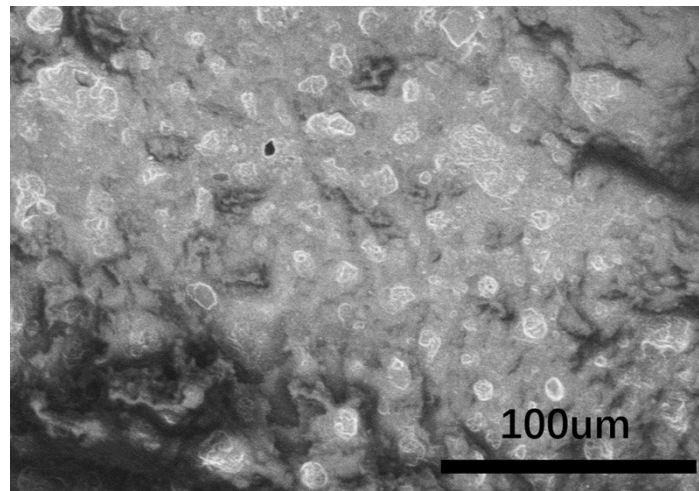

Fig.S14 SEM image of the Eu<sup>3+</sup>@NENU-5 thin film.

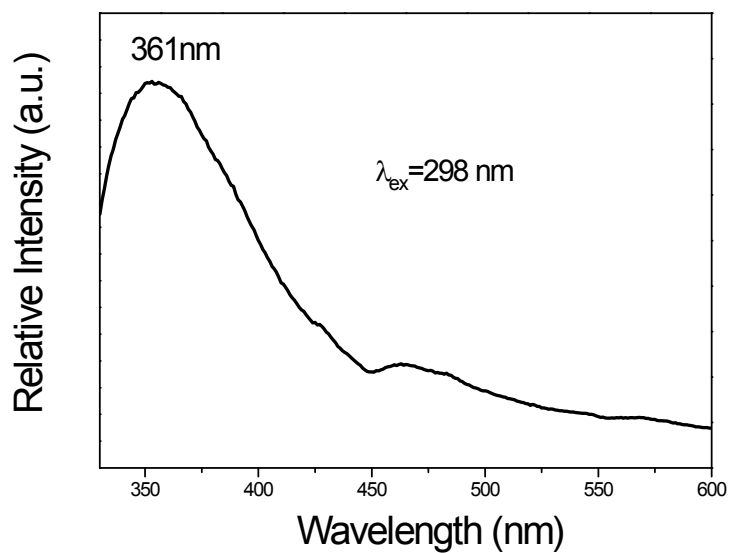

Fig. S15 Emission spectra of the pure thin film.

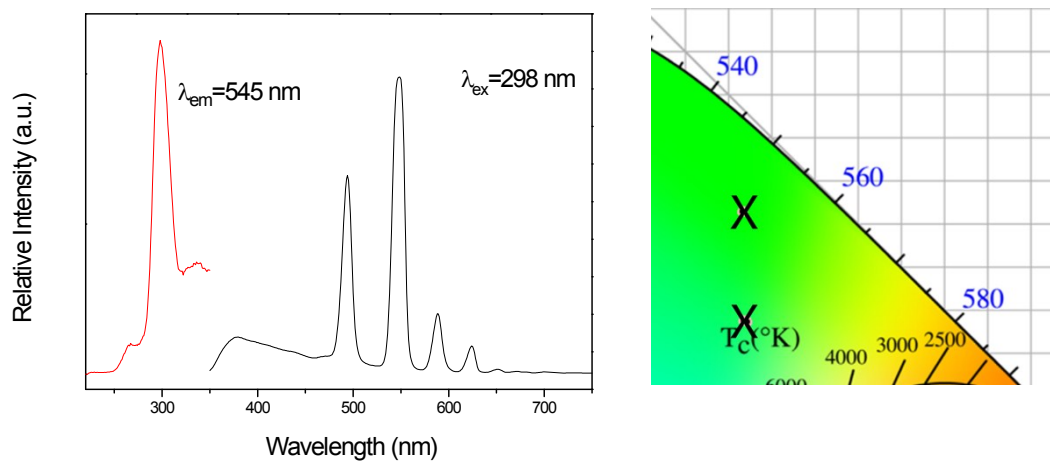

Fig. S16 Photoluminescence spectra of  $\text{Tb}^{3+}$ @NENU-5 thin film and the comparison of CIE coordinate

Table S1 ICP-MS analysis of Ln<sup>3+</sup>-NENU5(Ln = Eu, Tb, Sm, Dy, Eu/Tb)

| Sample                                | Eu(ppm) | Tb(ppm) | Sm(ppm) | Dy(ppm) | Cu (ppm) | Ln <sup>3+</sup> : La <sup>3+</sup><br>(Molar Ratio) |
|---------------------------------------|---------|---------|---------|---------|----------|------------------------------------------------------|
| Eu <sup>3+</sup> @1                   | 1.84    | --      | --      | --      | 17.62    | 1: 22.7                                              |
| Tb <sup>3+</sup> @1                   | --      | 3.13    | --      | --      | 34.24    | 1: 23.4                                              |
| Sm <sup>3+</sup> @1                   | --      | --      | 1.29    | --      | 15.06    | 1: 26.2                                              |
| Dy <sup>3+</sup> @1                   | --      | --      | --      | 2.18    | 21.55    | 1: 25.3                                              |
| Eu <sup>3+</sup> /Tb <sup>3+</sup> @1 | 1.45    | 0.63    | --      | --      | 14.52    | 1:1: 25.7                                            |

Table S2 The peak position and the corresponding transition related to the Ln<sup>3+</sup> of the Ln<sup>3+</sup> @NENU-5 materials (Ln = Eu, Tb, Sm, Dy).

| Sample                   | Position (nm) | transition                                                     |
|--------------------------|---------------|----------------------------------------------------------------|
| Eu <sup>3+</sup> @NENU-5 | 584           | <sup>5</sup> D <sub>0</sub> → <sup>7</sup> F <sub>0</sub>      |
|                          | 592           | <sup>5</sup> D <sub>0</sub> → <sup>7</sup> F <sub>1</sub>      |
|                          | 615           | <sup>5</sup> D <sub>0</sub> → <sup>7</sup> F <sub>2</sub>      |
|                          | 649           | <sup>5</sup> D <sub>0</sub> → <sup>7</sup> F <sub>3</sub>      |
|                          | 695           | <sup>5</sup> D <sub>0</sub> → <sup>7</sup> F <sub>4</sub>      |
| Tb <sup>3+</sup> @NENU-5 | 489           | <sup>5</sup> D <sub>4</sub> → <sup>7</sup> F <sub>6</sub>      |
|                          | 545           | <sup>5</sup> D <sub>4</sub> → <sup>7</sup> F <sub>5</sub>      |
|                          | 583           | <sup>5</sup> D <sub>4</sub> → <sup>7</sup> F <sub>4</sub>      |
|                          | 621           | <sup>5</sup> D <sub>4</sub> → <sup>7</sup> F <sub>3</sub>      |
| Sm <sup>3+</sup> @NENU-5 | 562           | <sup>4</sup> G <sub>5/2</sub> → <sup>6</sup> H <sub>5/2</sub>  |
|                          | 596           | <sup>4</sup> G <sub>5/2</sub> → <sup>6</sup> H <sub>7/2</sub>  |
|                          | 642           | <sup>4</sup> G <sub>5/2</sub> → <sup>6</sup> H <sub>9/2</sub>  |
|                          | 704           | <sup>4</sup> G <sub>5/2</sub> → <sup>6</sup> H <sub>11/2</sub> |
| Dy <sup>3+</sup> @NENU-5 | 481           | <sup>7</sup> F <sub>9/2</sub> → <sup>6</sup> H <sub>15/2</sub> |
|                          | 575           | <sup>7</sup> F <sub>9/2</sub> → <sup>6</sup> H <sub>13/2</sub> |

Table S3 CIE chromaticity coordinates of Sm<sup>3+</sup>@NENU-5 in various excitation from 255 to 300nm.

| Excitation wavelength | X      | Y      |
|-----------------------|--------|--------|
| 255nm                 | 0.3212 | 0.3289 |
| 260nm                 | 0.3577 | 0.3366 |
| 265nm                 | 0.3691 | 0.3381 |
| 270nm                 | 0.3544 | 0.3322 |
| 275nm                 | 0.3348 | 0.3214 |
| 280nm                 | 0.332  | 0.3187 |
| 285nm                 | 0.3333 | 0.3162 |
| 290nm                 | 0.3365 | 0.3193 |
| 295nm                 | 0.3241 | 0.315  |
| 300nm                 | 0.3367 | 0.3171 |

Table S4 Luminescence lifetimes ( $\tau$ ) of Ln<sup>3+</sup>@NENU-5((Ln = Eu, Tb, Sm, Dy, Eu/Tb))

| Sample                                      | $\lambda_{\text{ex}}$ (nm) | $\lambda_{\text{em}}$ (nm) | $\tau$ ( $\mu$ s) |
|---------------------------------------------|----------------------------|----------------------------|-------------------|
| Eu <sup>3+</sup> @ NENU-5                   | 294                        | 615                        | 351.61            |
| Tb <sup>3+</sup> @ NENU-5                   | 295                        | 543                        | 637.51            |
| Sm <sup>3+</sup> @ NENU-5                   | 296                        | 598                        | 15.63             |
| Dy <sup>3+</sup> @ NENU-5                   | 294                        | 574                        | 33.68             |
| Eu <sup>3+</sup> /Tb <sup>3+</sup> @ NENU-5 | 295                        | 614                        | 476.25            |
| Eu <sup>3+</sup> /Tb <sup>3+</sup> @ NENU-5 | 295                        | 543                        | 278.21            |
